# Supplementary material
Source: Springer Nature journal article supplement (https://www.springermedizin.de/resource/supplementary/13054_2012_587_MOESM1_ESM.pdf/9708800)

A)

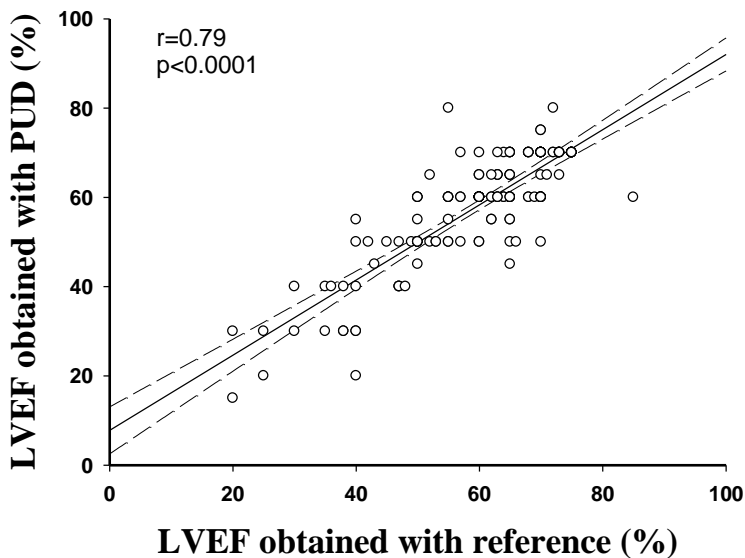

B)

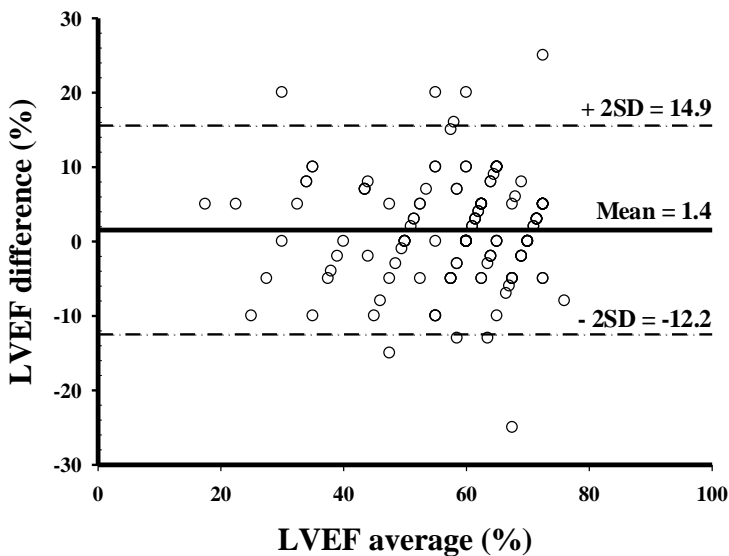

Supplement: MOESM1 [file 9708800]
